# Supplementary material for: A Hg2+ selective fluorescent chemosensor based on rhodamine B thiohydrazide and its application in bioimaging
Source: Royal Society of Chemistry journal article supplement (doi:10.1039/c2ay25287b), 2012-01-01
Supplement: c2ay25287b.pdf [file c2ay25287b.pdf]

*Supplementary Information for*

**A Hg<sup>2+</sup> selective fluorescent chemosensor based on Rhodamine B thiohydrazide and its application in bioimaging**

**Liping Wang,<sup>a</sup> Baozhan Zheng,<sup>a</sup> Yan Zhao,<sup>a</sup> Juan Du,<sup>\*a</sup> Dan Xiao<sup>\*ab</sup>**

<sup>a</sup> College of Chemistry, Sichuan University, Chengdu 610064, PR China

<sup>b</sup> College of Chemical Engineering, Sichuan University, Chengdu 610065, PR China

corresponding author: Dan Xiao e-mail: [xiaodan@scu.edu.cn](mailto:xiaodan@scu.edu.cn)

Juan Du e-mail: [lxdj@vip.sina.com](mailto:lxdj@vip.sina.com)

Tel: +86-028-85415029

Fax: +86-028-85416029

**Fig. S1.** Scheme 1. Synthesis of RN2.-----S2

**Fig. S2.** <sup>1</sup>H NMR of RN1-----S3

**Fig. S3.** <sup>1</sup>H NMR of RN2-----S4

**Fig. S4.** <sup>13</sup>C NMR of RN2-----S5

**Fig. S5.** ESI-MS of RN2-----S6

**Fig. S6.** Changes in the fluorescence intensities of 10μM RN2 upon addition of 1 equivalents of Hg<sup>2+</sup> in 1:9-9:1

CH<sub>3</sub>CN/PBS (v/v) buffer solution. The excitation wavelength was 510nm.-----S7

**Fig. S7.** Job's plot of the complexation between RN2 and Hg<sup>2+</sup> with a total concentration of 50μM in CH<sub>3</sub>CN/PBS

(1:1, v/v pH 7.5) buffer solution.-----S7

**Fig. S8.** Scheme 2. Proposed binding modes of RN2 with Hg<sup>2+</sup>.-----S7

24 **Fig. S9.** Variation of absorbance of RN2 (10 $\mu$ M) in the presence of 2 equiv Hg<sup>2+</sup> in CH<sub>3</sub>CN/PBS (1:1, v/v) buffer  
25 solution as function of different pH values.-----S8

26 **Fig. S10.** Photograph of fluorescence changes of RN2 sensing membrane upon addition of Hg<sup>2+</sup> in the CH<sub>3</sub>CN/PBS  
27 (1:1, v/v pH 7.5) buffer solution (from left to right: 1.0 $\times$ 10<sup>-10</sup> M, 1.0 $\times$ 10<sup>-9</sup> M, 1.0 $\times$ 10<sup>-8</sup> M, 1.0 $\times$ 10<sup>-7</sup> M, 1.0 $\times$ 10<sup>-6</sup> M,  
28 1.0 $\times$ 10<sup>-5</sup> M, 1.0 $\times$ 10<sup>-4</sup> M, 1.0 $\times$ 10<sup>-3</sup> M).-----S8

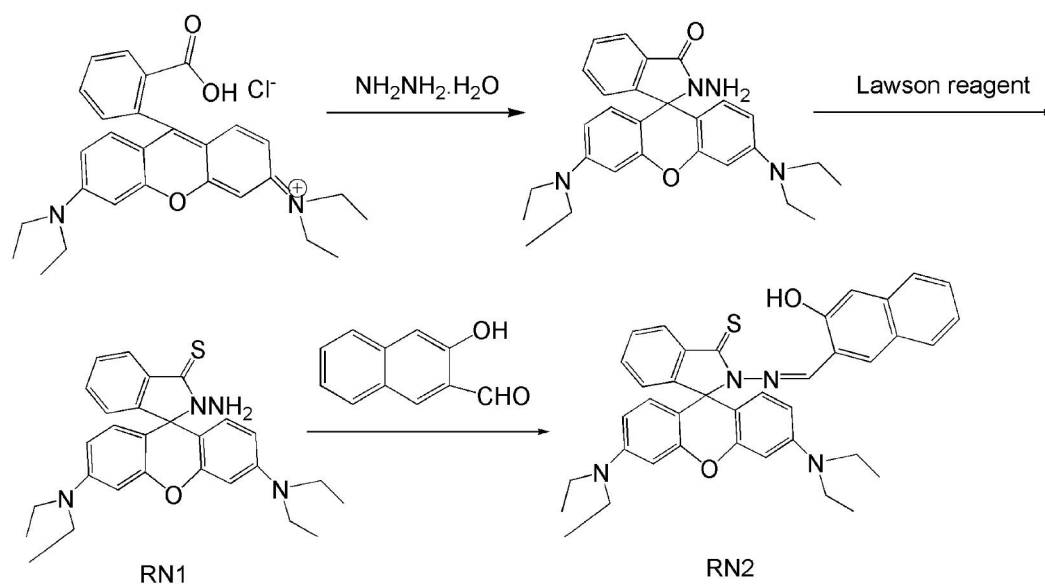

**Figure S1.** Scheme 1. Synthesis of RN2.

36

37

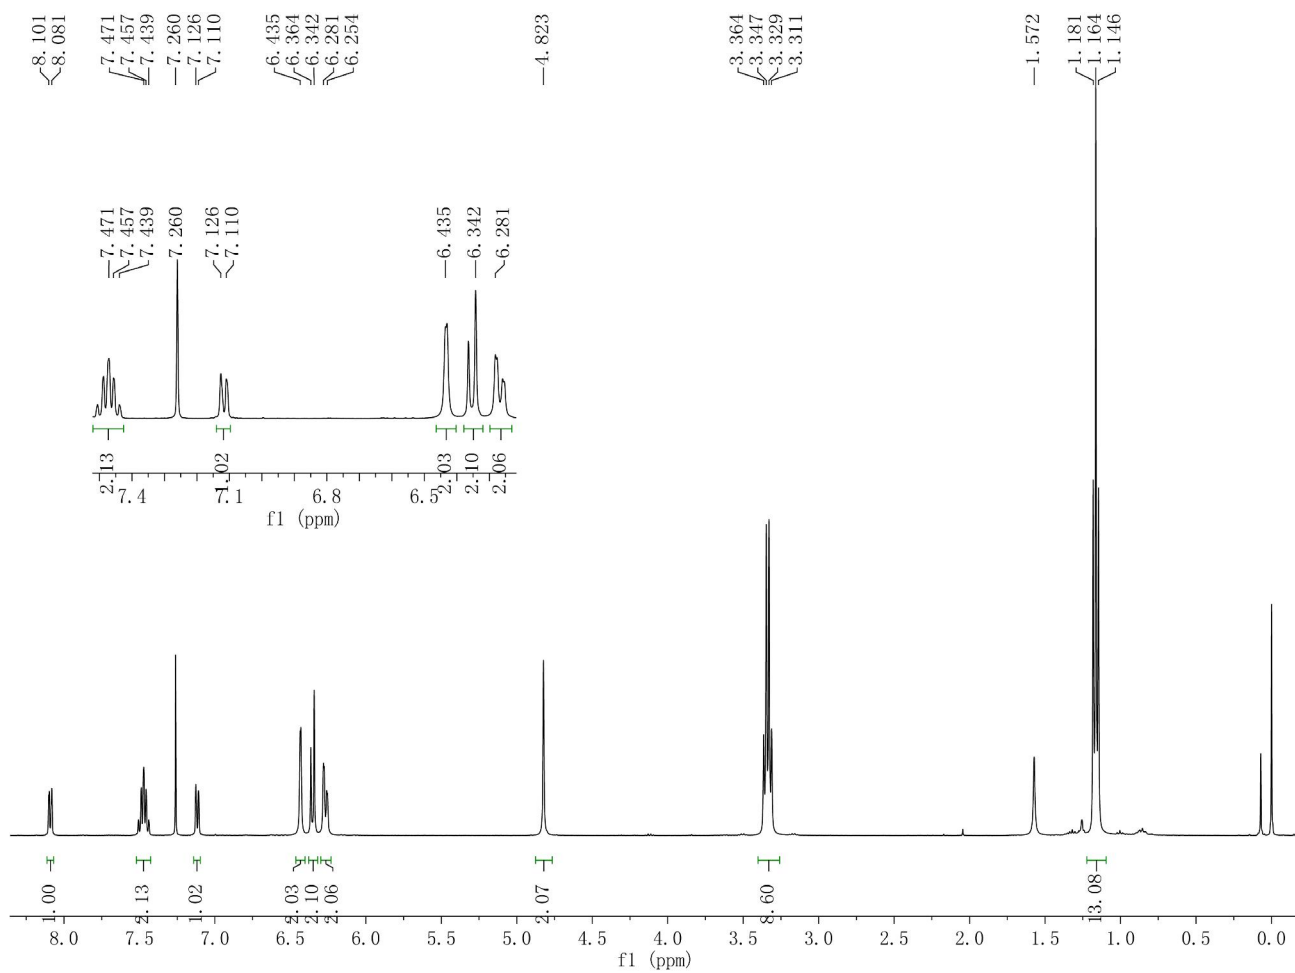

38

39

40

41

42

43

44

Fig. S2. <sup>1</sup>H NMR of RN1

45

46

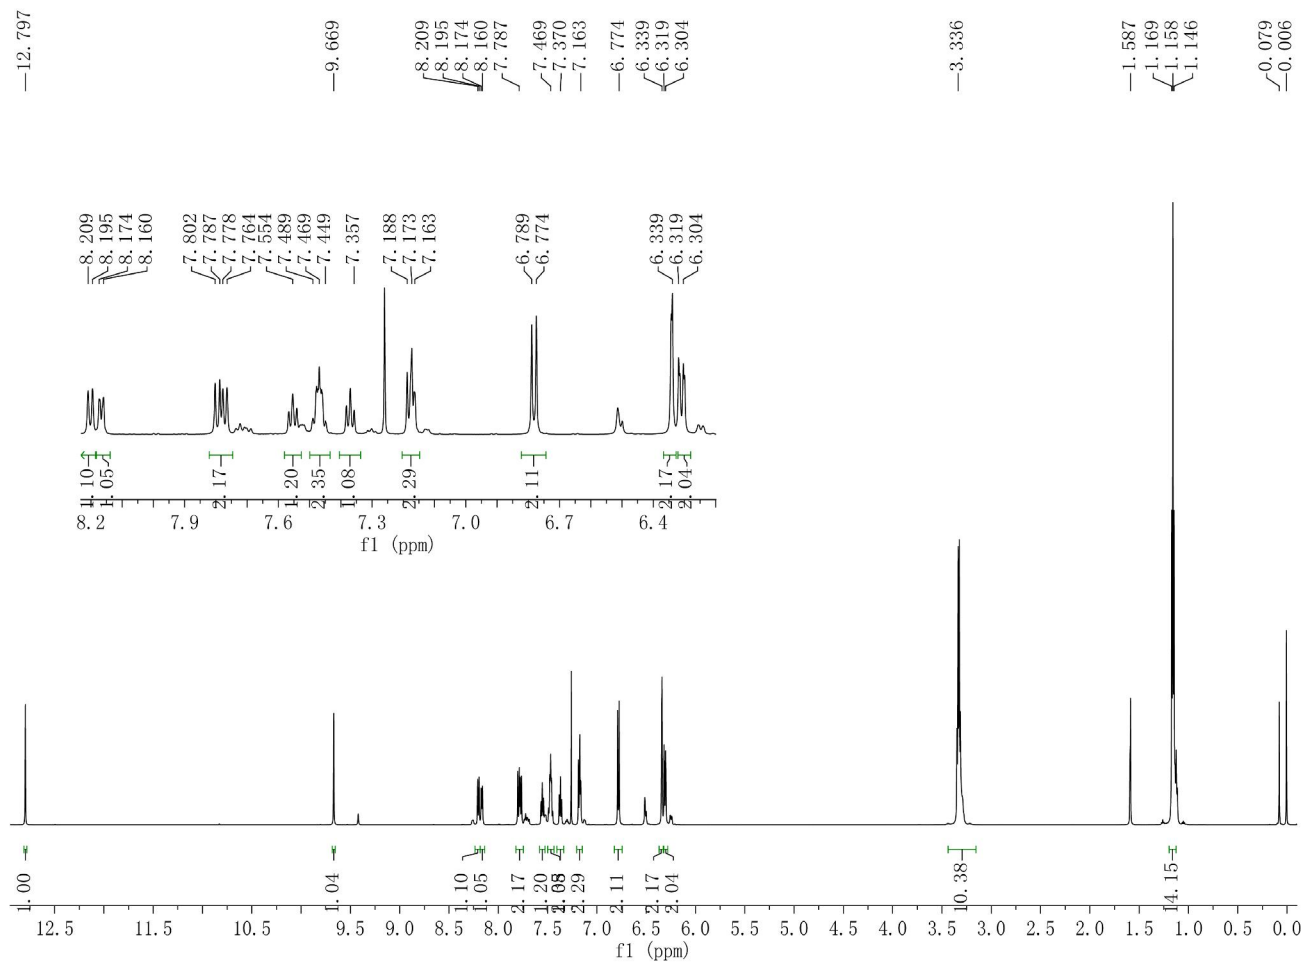

47

48

49

50

51

52

53

Fig. S3. <sup>1</sup>H NMR of RN2

54

55

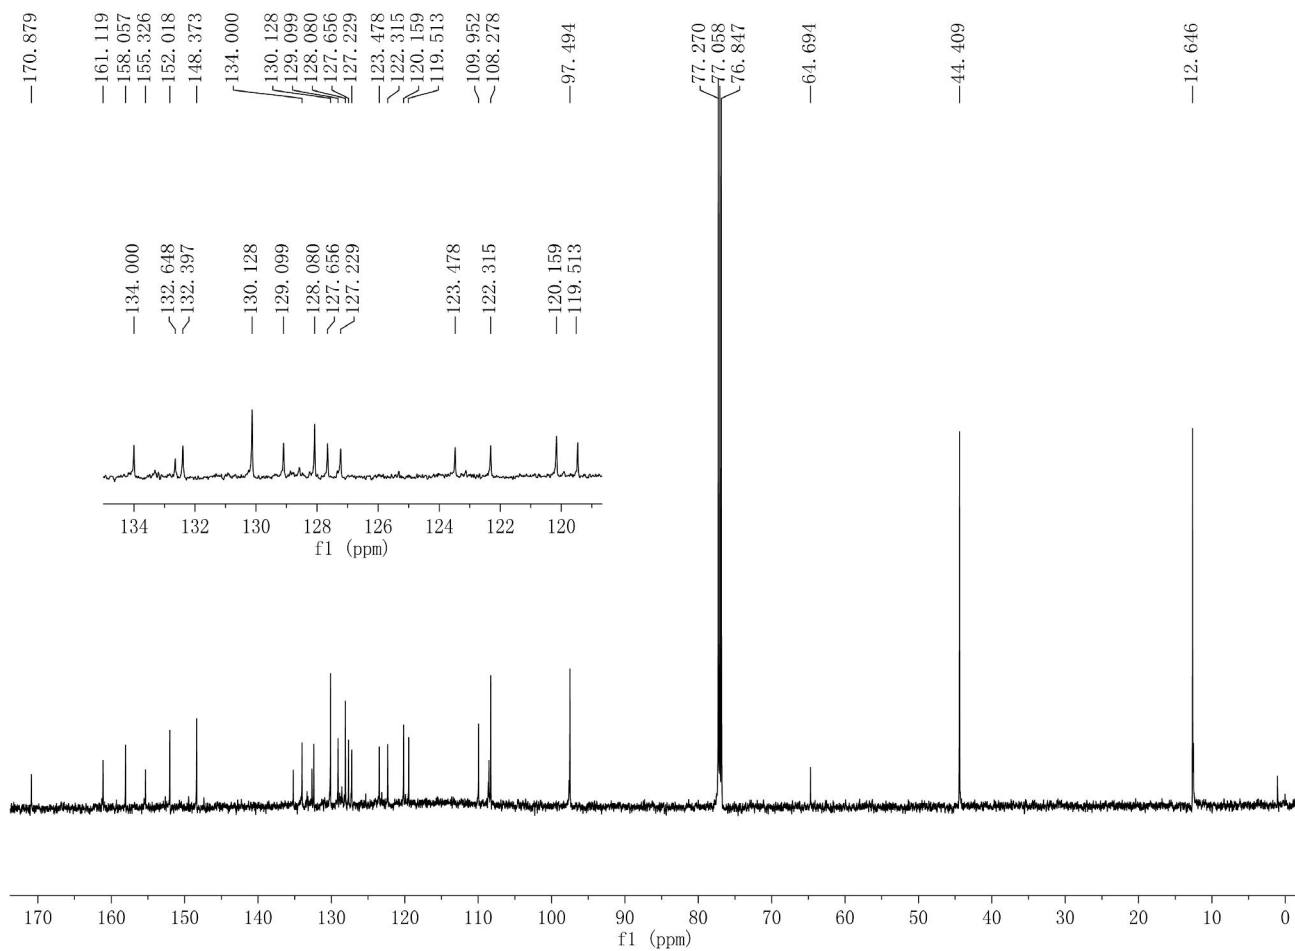

56

57

58

59

60

61

62

**Fig. S4.**  $^{13}\text{C}$  NMR of RN2

63

64

YJ11-036- #478-491 RT: 4.13-4.24 AV: 14 SB: 53 5.68-6.12 NL: 1.93E7  
T: + c ESI Q1MS [550.000-700.000]

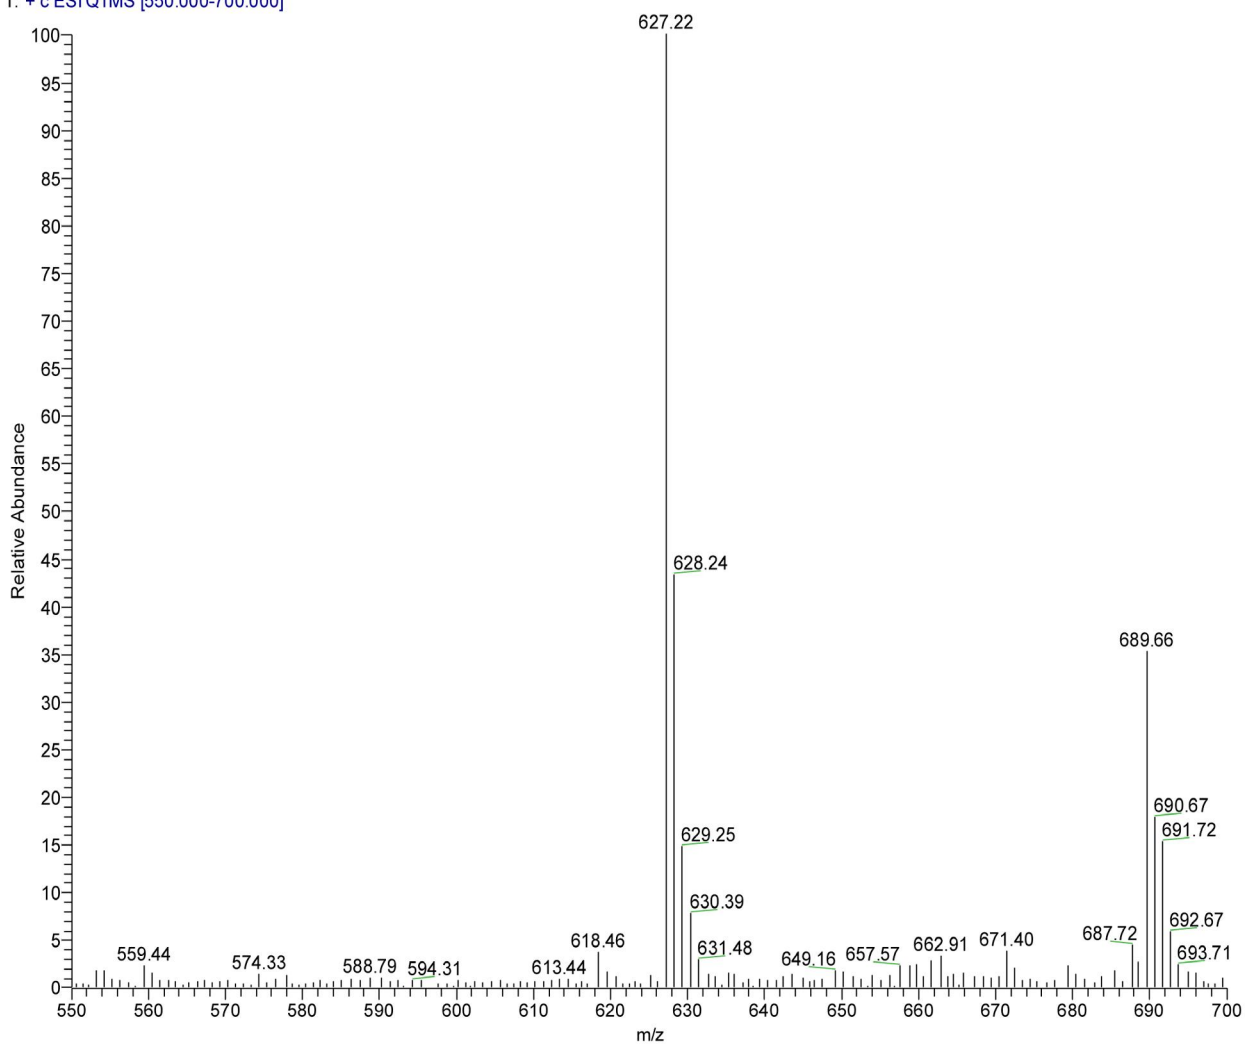

65

66

67

68

69

70

**Fig. S5.** ESI-MS of RN2

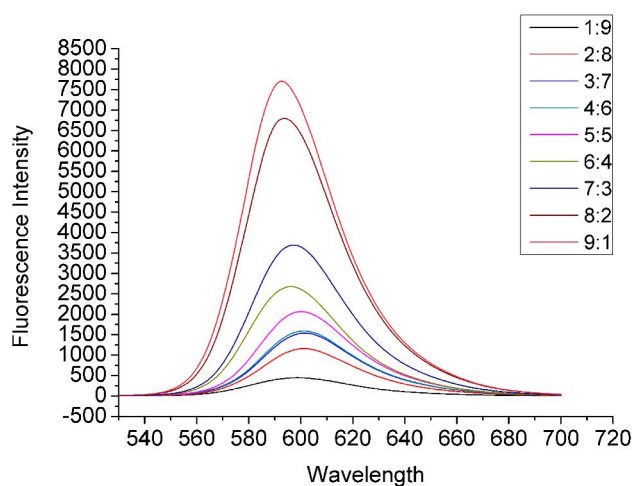

71

72 **Fig. S6.** Changes in the fluorescence intensities of 10 μM RN2 upon addition of 1 equivalents of Hg<sup>2+</sup> in 1:9-9:1  
73 CH<sub>3</sub>CN/PBS (v/v) buffer solution. The excitation wavelength was 510nm.

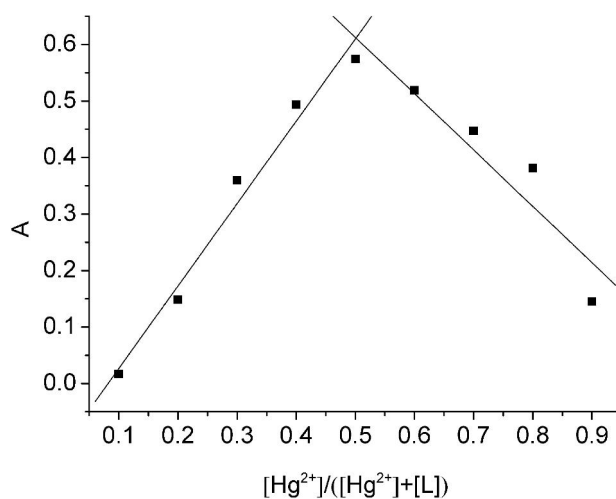

74

75 **Figure S7.** Job's plot of the complexation between RN2 and Hg<sup>2+</sup> with a total concentration of 50 μM in  
76 CH<sub>3</sub>CN/PBS (1:1, v/v pH 7.5) buffer solution.

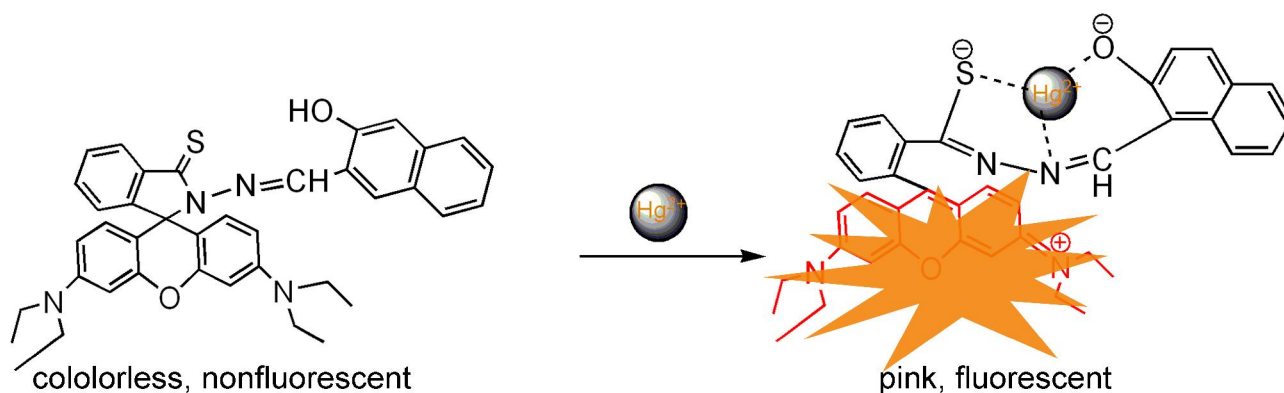

77

78

79

**Figure S8.** Scheme 2. Proposed binding modes of RN2 with Hg<sup>2+</sup>.

80

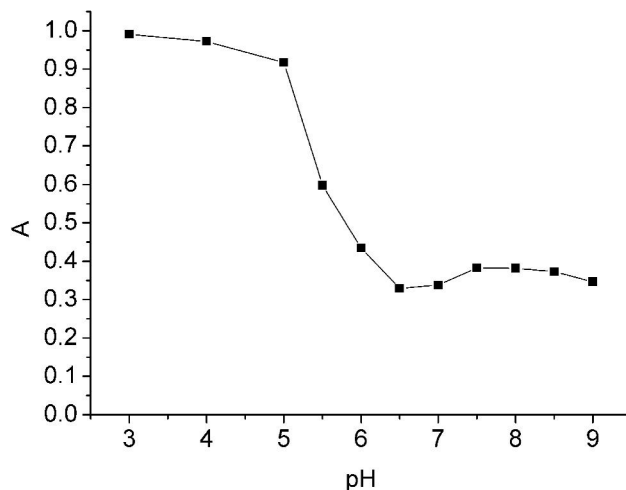

81

82 **Figure S9.** Variation of absorbance of RN2 (10 $\mu$ M) in the presence of 2 equiv Hg<sup>2+</sup> in CH<sub>3</sub>CN/PBS (1:1, v/v) buffer  
83 solution as function of different pH values

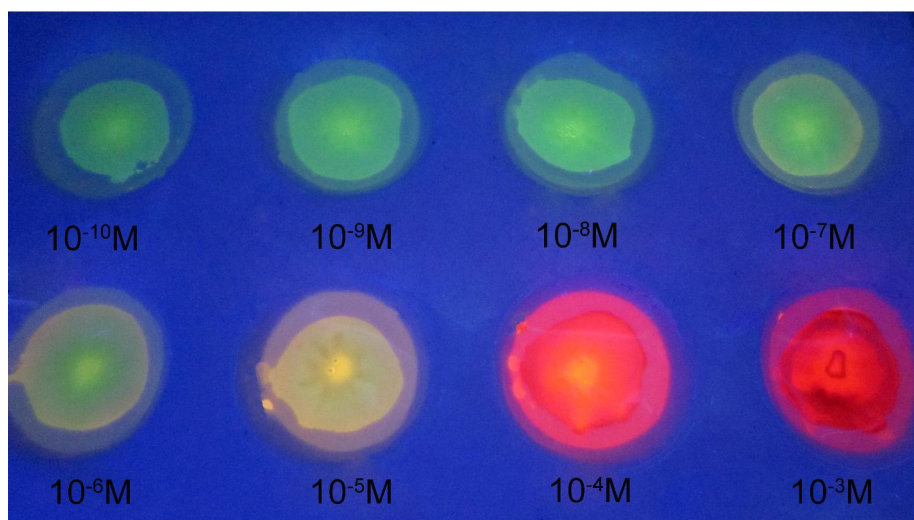

84

85 **Figure S10.** Photograph of fluorescence changes of RN2 sensing membrane upon addition of Hg<sup>2+</sup> (from left to  
86 right: 1.0 $\times$ 10<sup>-10</sup> M, 1.0 $\times$ 10<sup>-9</sup> M, 1.0 $\times$ 10<sup>-8</sup> M, 1.0 $\times$ 10<sup>-7</sup> M, 1.0 $\times$ 10<sup>-6</sup> M, 1.0 $\times$ 10<sup>-5</sup> M, 1.0 $\times$ 10<sup>-4</sup> M, 1.0 $\times$ 10<sup>-3</sup> M).

87

88

89

90

91

92

93
